# Supplementary material
Source: Springer Nature journal article supplement (https://www.springermedizin.de/resource/supplementary/12946_2009_125_MOESM4_ESM.pdf/9555616)

**Acute series**

**6 Sham**

**6 Aortoportal shunt**

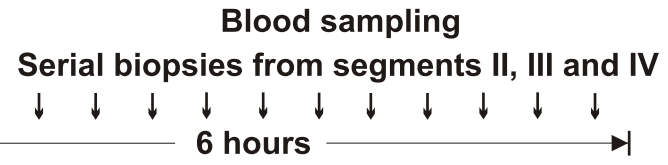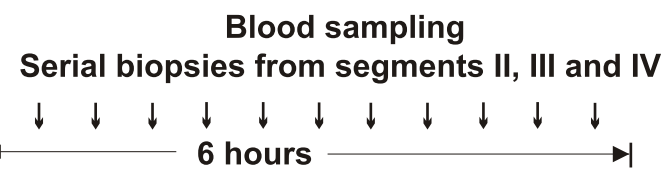

**Chronic series**

**7 Aortoportal shunt**

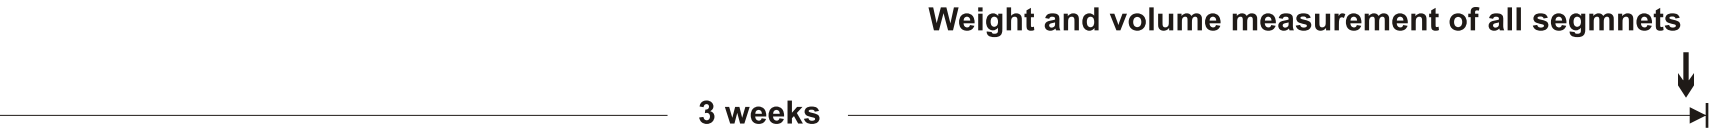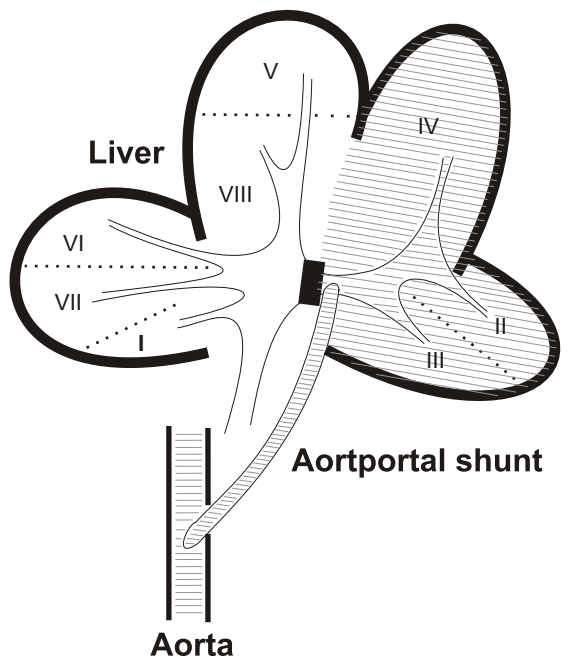

Supplement: MOESM4 [file 9555616]
